# Supplementary material
Source: PubMed Central journal article supplement (PMC2867515)
Supplement: 00836.2009_1.pdf [file 00836.2009_1.pdf]

# Supplementary Data Table 1.

| eNOS <sup>-/-</sup> Sham vs eNOS <sup>+/+</sup> Sham |               |             | eNOS <sup>-/-</sup> Phx vs eNOS <sup>+/+</sup> Phx |               |             | eNOS <sup>+/+</sup> Phx vs eNOS <sup>+/+</sup> Sham |               |             | eNOS <sup>-/-</sup> Phx vs eNOS <sup>-/-</sup> Sham |               |             |
|------------------------------------------------------|---------------|-------------|----------------------------------------------------|---------------|-------------|-----------------------------------------------------|---------------|-------------|-----------------------------------------------------|---------------|-------------|
| <u>Genes Up-regulated</u>                            |               |             | <u>Genes Up-regulated</u>                          |               |             | <u>Genes Up-regulated</u>                           |               |             | <u>Genes Up-regulated</u>                           |               |             |
| GeneBank                                             | Gene Symbol   | Fold Change | GeneBank                                           | Gene Symbol   | Fold Change | GeneBank                                            | Gene Symbol   | Fold Change | GeneBank                                            | Gene Symbol   | Fold Change |
| <i>NVI_007465</i>                                    | <i>Birc2</i>  | 23.2        | NM_011058                                          | <i>Pdgfra</i> | 1.5         | <i>NVI_011058</i>                                   | <i>Pdgfra</i> | 16.1        | <i>NVI_011058</i>                                   | <i>Pdgfra</i> | 9.9         |
| NM_011058                                            | <i>Pdgfra</i> | 2.0         | NM_008968                                          | <i>Ptgis</i>  | 2.0         | <i>NVI_008968</i>                                   | <i>Ptgis</i>  | 20.6        | <i>NVI_008968</i>                                   | <i>Ptgis</i>  | 11.9        |
| NM_008968                                            | <i>Ptgis</i>  | 3.6         | NM_008610                                          | <i>Mmp2</i>   | 1.4         | NM_008610                                           | <i>Mmp2</i>   | 2.2         | <i>NVI_008610</i>                                   | <i>Mmp2</i>   | 4.5         |
| NM_010177                                            | <i>Fasl</i>   | 2.1         | NM_009969                                          | <i>Csf2</i>   | 1.5         | NM_009969                                           | <i>Csf2</i>   | 6.0         |                                                     |               |             |
| NM_00816                                             | <i>Pecam1</i> | 1.5         |                                                    |               |             |                                                     |               |             |                                                     |               |             |
| NM_011693                                            | <i>Vcam1</i>  | 1.6         |                                                    |               |             |                                                     |               |             |                                                     |               |             |
| NM_010104                                            | <i>Edn1</i>   | 1.1         |                                                    |               |             |                                                     |               |             |                                                     |               |             |
| NM_007551                                            | <i>Cxcr5</i>  | 3.2         |                                                    |               |             |                                                     |               |             |                                                     |               |             |
| NM_009810                                            | <i>Casp3</i>  | 1.2         |                                                    |               |             |                                                     |               |             |                                                     |               |             |
| NM_011333                                            | <i>Ccl2</i>   | 1.4         |                                                    |               |             |                                                     |               |             |                                                     |               |             |
| NM_008176                                            | <i>Cxcl1</i>  | 2.5         |                                                    |               |             |                                                     |               |             |                                                     |               |             |
| NM_009140                                            | <i>Cxcl2</i>  | 1.1         |                                                    |               |             |                                                     |               |             |                                                     |               |             |
| NM_010228                                            | <i>Fit1</i>   | 1.6         |                                                    |               |             |                                                     |               |             |                                                     |               |             |
| NM_010927                                            | <i>Nos2</i>   | 1.0         |                                                    |               |             |                                                     |               |             |                                                     |               |             |
| NM_177322                                            | <i>Agtr1a</i> | 1.7         |                                                    |               |             |                                                     |               |             |                                                     |               |             |
| <u>Genes Down-regulated</u>                          |               |             | <u>Genes Down-regulated</u>                        |               |             | <u>Genes Down-regulated</u>                         |               |             | <u>Genes Down-regulated</u>                         |               |             |
| GeneBank                                             | Gene Symbol   | Fold Change | GeneBank                                           | Gene Symbol   | Fold Change | GeneBank                                            | Gene Symbol   | Fold Change | GeneBank                                            | Gene Symbol   | Fold Change |
| NM_009741                                            | <i>Bcl2</i>   | 1.0         | NM_007465                                          | <i>Birc2</i>  | 1.5         | NM_007465                                           | <i>Birc2</i>  | 1.6         | <i>NVI_007465</i>                                   | <i>Birc2</i>  | 55.2        |
| NM_009969                                            | <i>Csf2</i>   | 2.3         | NM_009741                                          | <i>Bcl2</i>   | 2.6         | NM_009741                                           | <i>Bcl2</i>   | 1.6         | <i>NVI_009741</i>                                   | <i>Bcl2</i>   | 4.1         |
|                                                      |               |             | NM_010177                                          | <i>Fasl</i>   | 1.4         | NM_010177                                           | <i>Fasl</i>   | 1.4         | <i>NVI_010177</i>                                   | <i>Fasl</i>   | 4.0         |
|                                                      |               |             | NM_00816                                           | <i>Pecam1</i> | 1.5         | <i>NVI_00816</i>                                    | <i>Pecam1</i> | 13.0        | <i>NVI_00816</i>                                    | <i>Pecam1</i> | 21.6        |
|                                                      |               |             | NM_011693                                          | <i>Vcam1</i>  | 1.0         | NM_011693                                           | <i>Vcam1</i>  | 3.5         | NM_011693                                           | <i>Vcam1</i>  | 6.0         |
|                                                      |               |             | NM_010104                                          | <i>Edn1</i>   | 1.7         | NM_010104                                           | <i>Edn1</i>   | 3.1         | <i>NVI_010104</i>                                   | <i>Edn1</i>   | 5.8         |
|                                                      |               |             | NM_007551                                          | <i>Cxcr5</i>  | 1.8         | NM_007551                                           | <i>Cxcr5</i>  | 1.1         | <i>NVI_007551</i>                                   | <i>Cxcr5</i>  | 6.4         |
|                                                      |               |             | NM_009810                                          | <i>Casp3</i>  | 2.3         | NM_009810                                           | <i>Casp3</i>  | 1.9         | <i>NVI_009810</i>                                   | <i>Casp3</i>  | 5.0         |
|                                                      |               |             | NM_011333                                          | <i>Ccl2</i>   | 3.6         | NM_011333                                           | <i>Ccl2</i>   | 1.0         | <i>NVI_011333</i>                                   | <i>Ccl2</i>   | 5.2         |
|                                                      |               |             | NM_008176                                          | <i>Cxcl1</i>  | 1.4         | <i>NVI_008176</i>                                   | <i>Cxcl1</i>  | 4.3         | <i>NVI_008176</i>                                   | <i>Cxcl1</i>  | 15.2        |
|                                                      |               |             | <i>NVI_009140</i>                                  | <i>Cxcl2</i>  | 4.2         | NM_009140                                           | <i>Cxcl2</i>  | 3.2         | <i>NVI_009140</i>                                   | <i>Cxcl2</i>  | 14.8        |
|                                                      |               |             | NM_010228                                          | <i>Fit1</i>   | 2.3         | NM_010228                                           | <i>Fit1</i>   | 1.2         | <i>NVI_010228</i>                                   | <i>Fit1</i>   | 4.5         |
|                                                      |               |             | NM_010927                                          | <i>Nos2</i>   | 1.5         | <i>NVI_010927</i>                                   | <i>Nos2</i>   | 7.0         | <i>NVI_010927</i>                                   | <i>Nos2</i>   | 10.5        |
|                                                      |               |             | NM_177322                                          | <i>Agtr1a</i> | 2.3         | NM_177322                                           | <i>Agtr1a</i> | 1.1         | <i>NVI_177322</i>                                   | <i>Agtr1a</i> | 4.3         |
|                                                      |               |             |                                                    |               |             | <i>NVI_009969</i>                                   | <i>Csf2</i>   | 6.0         | NM_009969                                           | <i>Csf2</i>   | 1.7         |

Supplementary Figure 1.

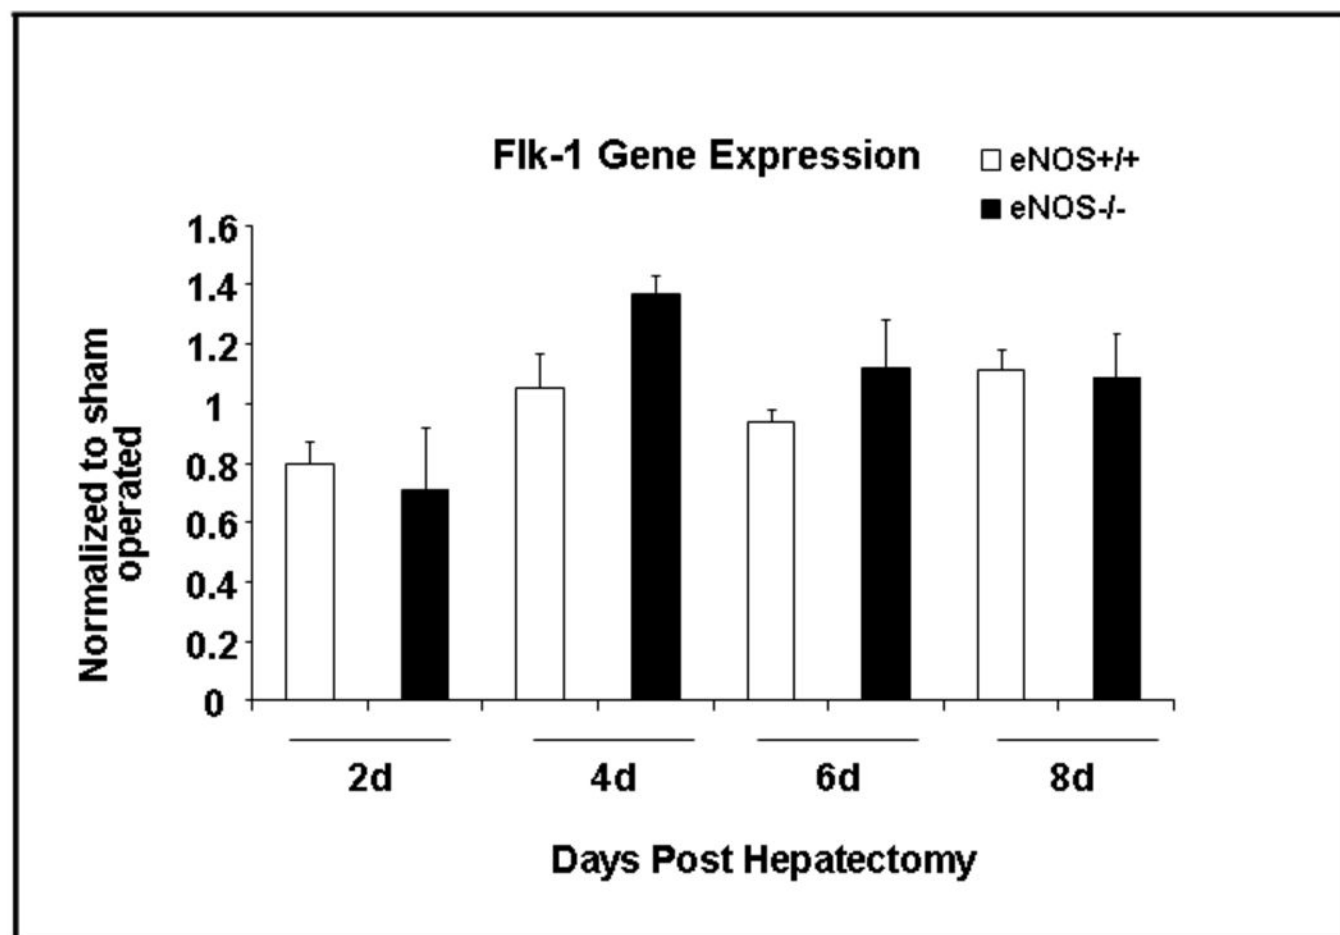

**Supplementary Data Table 1.** Sinusoidal endothelial cells isolated from eNOS<sup>-/-</sup> and eNOS<sup>+/+</sup> mice following partial hepatectomy and Sham surgeries were subjected to mouse endothelial cell biology RT<sup>2</sup> Profiler PCR array and the results analyzed to look for genes which were either upregulated or downregulated between different groups (Genes in italics represent those whose value were above or below the median range).

**Supplementary Figure 1.** Flk-1 levels as assessed by PCR are shown in eNOS +/+ and -/- mice in response to hepatectomy (no significant differences were seen between groups).
